# Supplementary material for: Self-assembly of size-controlled perovskite crystallite arrays on modulated substrates for laser applications
Source: Royal Society of Chemistry journal article supplement (doi:10.1039/d5tc00048c), 2025-01-01
Supplement: d5tc00048c1.pdf [file d5tc00048c1.pdf]

## Laser in self-assembly size-controlled perovskite crystallite arrays on modulated substrate

Bin Liu, Junhan Guo, Yang Tang, Hanying Zhang, Liang Qin\*, Zhidong Lou, Yufeng

Hu, Feng Teng and Yanbing Hou\*

Key Laboratory of Luminescence and Optical Information Ministry of Education

Beijing JiaoTong University

Beijing 100044, P. R. China.

E-mail address: qinliang@bjtu.edu.cn; ybhou@bjtu.edu.cn

**Table S1.** Laser thresholds of different perovskite materials under different Pump pulse lengths

| Active Material     | Threshold                  | Pump Pulse Length | Reference |
|---------------------|----------------------------|-------------------|-----------|
| FAPbI <sub>3</sub>  | 3 $\mu\text{J cm}^{-2}$    | 150 fs            | 1         |
| FAPbI <sub>3</sub>  | 19.5 $\mu\text{J cm}^{-2}$ | 5 ns              | 1         |
| MAPbI <sub>3</sub>  | 12 $\mu\text{J cm}^{-2}$   | 150 fs            | 2         |
| MAPbI <sub>3</sub>  | 54.1 $\mu\text{J cm}^{-2}$ | 5 ns              | 3         |
| CsPbBr <sub>3</sub> | 3.3 $\mu\text{J cm}^{-2}$  | 150 fs            | 4         |
| CsPbBr <sub>3</sub> | 64.9 $\mu\text{J cm}^{-2}$ | 5.5 ns            | 4         |
| MAPbBr <sub>3</sub> | 15 $\mu\text{J cm}^{-2}$   | 80 fs             | 5         |
| MAPbBr <sub>3</sub> | 14 $\mu\text{J cm}^{-2}$   | 5 ns              | this work |

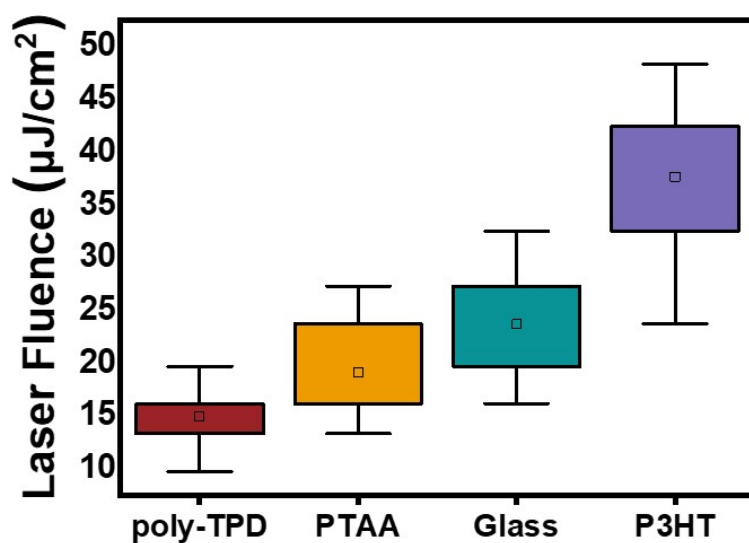

**Figure S1.** Threshold statistics of crystallites grown on poly-TPD, PTAA, Glass, P3HT films.

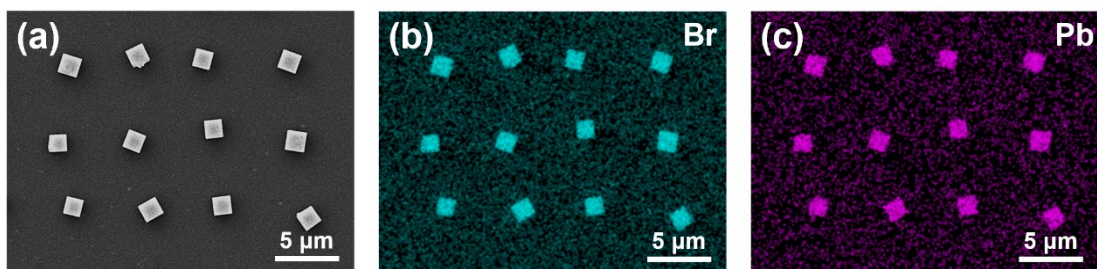

**Figure S2.** EDS maps of MAPbBr<sub>3</sub> crystallites. (a) SEM image, (b) and (c) distribution maps of Br and Pb.

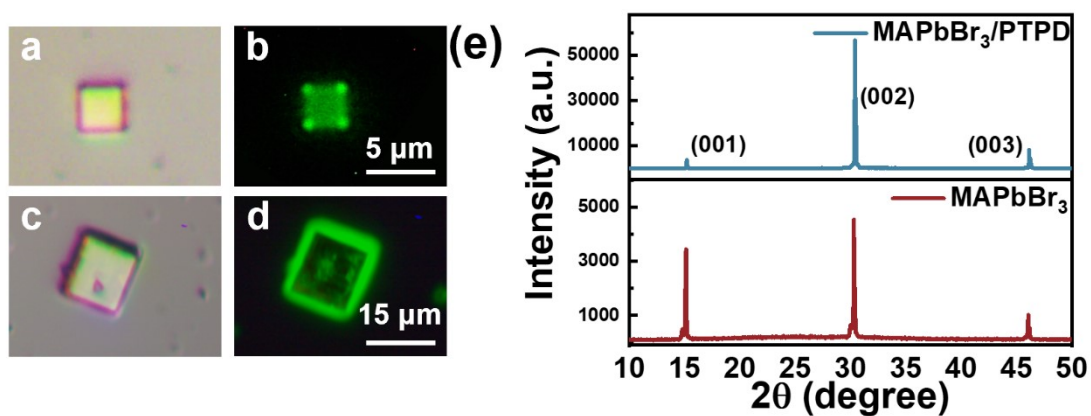

**Figure S3.** (a)(c) Microscopy photographs and (b)(d) fluorescence images of MAPbBr<sub>3</sub> crystallite grown on poly-TPD film (a) (b) and glass (c) (d). (e) Comparison of XRD patterns of the two crystallites.

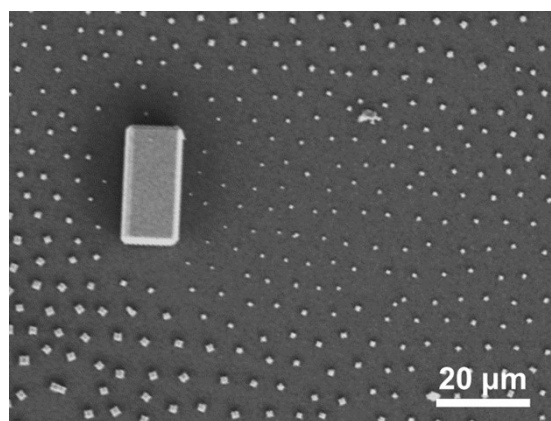

**Figure S4.** SEM image of crystallite array with special huge size and surrounding perovskite crystallite.

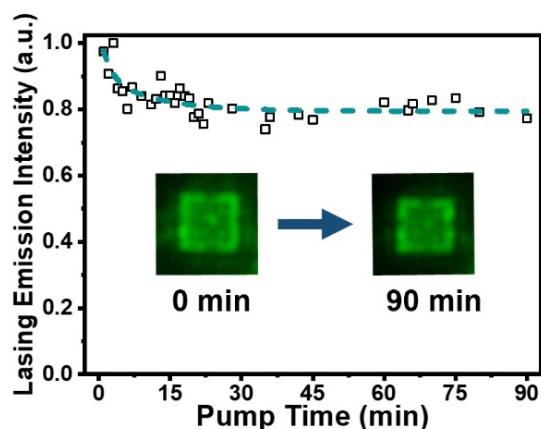

**Figure S5.** Stability of MAPbBr<sub>3</sub> crystallite under continuous irradiation of a 450 nm pulsed laser (5 ns, 10 Hz) in air. The insert figures are the fluorescence images of perovskite crystallite at beginning of excitation and 90 minutes after excitation.

## References

1. F. Yuan, Z. Wu, H. Dong, J. Xi, K. Xi, G. Divitini, B. Jiao, X. Hou, S. Wang and Q. Gong, *The Journal of Physical Chemistry C*, 2017, **121**, 15318-15325.
2. G. Xing, N. Mathews, S. S. Lim, N. Yantara, X. Liu, D. Sabba, M. Gratzel, S. Mhaisalkar and T. C. Sum, *Nat Mater*, 2014, **13**, 476-480.
3. L. Qin, L. Lv, Y. Ning, C. Li, Q. Lu, L. Zhu, Y. Hu, Z. Lou, F. Teng and Y. Hou, *RSC Advances*, 2015, **5**, 103674-103679.
4. L. Zhang, F. Yuan, H. Dong, B. Jiao, W. Zhang, X. Hou, S. Wang, Q. Gong and Z. Wu, *ACS Applied Materials & Interfaces*, 2018, **10**, 40661-40671.
5. S. Zhang, Q. Shang, W. Du, J. Shi, Z. Wu, Y. Mi, J. Chen, F. Liu, Y. Li, M. Liu, Q. Zhang and X. Liu, *Advanced Optical Materials*, 2017, **6**.
